# Supplementary material for: ATP induces folding of ALS-causing C71G-hPFN1 and nascent hSOD1
Source: PubMed Central journal article supplement (PMC10480188; doi:10.1038/s42004-023-00997-0), 2023-09-05
Supplement: 42004_2023_997_MOESM2_ESM.pdf [file 42004_2023_997_MOESM2_ESM.pdf]

# Description of Additional Supplementary Files

**File name:** Supplementary Data 1

**Description:** Raw data for Fig. 2c and 2c, Fig. 5c and 5d, Fig. 8a
